# Supplementary material for: Synthesis of bis-furyl-pyrrolo[3,4-b]pyridin-5-ones via Ugi–Zhu reaction and in vitro activity assays against human SARS-CoV-2 and in silico studies on its main proteins
Source: Royal Society of Chemistry journal article supplement (doi:10.1039/d2md00350c), 2022-11-18
Supplement: d2md00350c1.pdf [file d2md00350c1.pdf]

## SUPPLEMENTARY MATERIAL

# Synthesis of *bis*-furyl-pyrrolo[3,4-*b*]pyridin-5-ones *via* Ugi-Zhu Reaction and *In Vitro* Activity Assays Against Human SARS-CoV-2 and *In Silico* Studies on its main Proteins

Ivette Morales-Salazar <sup>1</sup>, Flora P. Montes-Enríquez <sup>1</sup>, Carlos E. Garduño-Albino <sup>1</sup>, M. A. García-Sánchez <sup>1</sup>, Ilich A. Ibarra <sup>2</sup>, Yareli Rojas-Aguirre <sup>3</sup>, Montserrat Elemei García-Hernández <sup>4</sup>, Rosa Elena Sarmiento-Silva <sup>5</sup>, Sofía Lizeth Alcaraz-Estrada <sup>6,\*</sup>, Erik Díaz-Cervantes <sup>7,\*</sup>, Eduardo González-Zamora <sup>1,\*</sup>, and Alejandro Islas-Jácome <sup>1,\*</sup>

<sup>1</sup> Departamento de Química, Universidad Autónoma Metropolitana-Iztapalapa, Av. Ferrocarril San Rafael Atlixco 186, Col. Leyes de Reforma 1A Sección, Iztapalapa, C.P. 09310, Ciudad de México.

<sup>2</sup> Laboratorio de Físicoquímica y Reactividad de Superficies, Instituto de Investigaciones en Materiales, Universidad Nacional Autónoma de México, Circuito Exterior S/N, Ciudad Universitaria, Coyoacán, C.P. 04510, Ciudad de México.

<sup>3</sup> Departamento de Polímeros, Instituto de Investigaciones en Materiales, Universidad Nacional Autónoma de México, Circuito Exterior S/N, Ciudad Universitaria, Coyoacán, C.P. 04510, Ciudad de México.

<sup>4</sup> Departamento de Microbiología e Inmunología, Facultad de Medicina, Veterinaria y Zootecnia, Universidad Nacional Autónoma de México, Av. Universidad 3000, Ciudad Universitaria, Coyoacán, C.P. 04510, Ciudad de México.

<sup>5</sup> Laboratorio de Virología y Laboratorio Mixto Internacional ELDORADO, Facultad de Medicina, Veterinaria y Zootecnia, Universidad Nacional Autónoma de México, Av. Universidad 3000, Ciudad Universitaria, Coyoacán, C.P. 04510, Ciudad de México.

<sup>6</sup> División de Medicina Genómica, Centro Médico Nacional 20 de Noviembre, ISSSTE, Félix Cuevas 540, Col. Del Valle Sur, Benito Juárez, C.P. 03100, Ciudad de México.

<sup>7</sup> Departamento de Alimentos, Centro Interdisciplinario del Noreste, Universidad de Guanajuato, Tierra Blanca, Guanajuato, C.P. 37975, México.

## CONTENTS

|                   |     |
|-------------------|-----|
| 1. Spectra        | S2  |
| 2. Docking        | S12 |
| 3. Cell viability | S15 |

## 1. Spectra

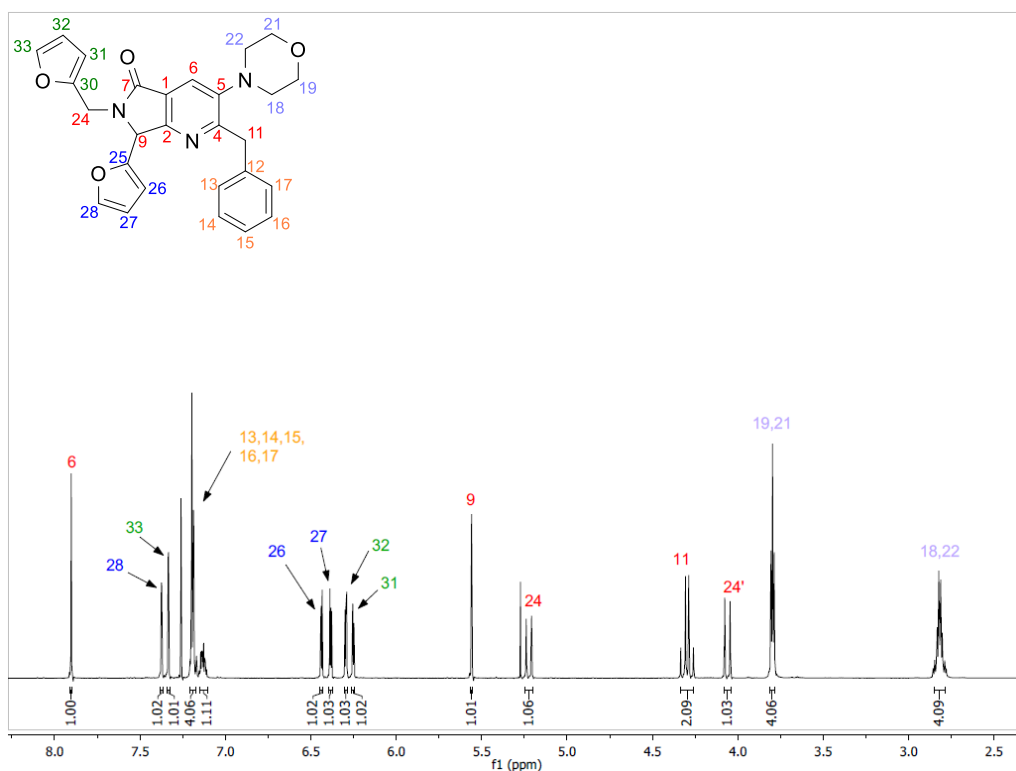

Figure S1. <sup>1</sup>H NMR spectrum of the compound 1a

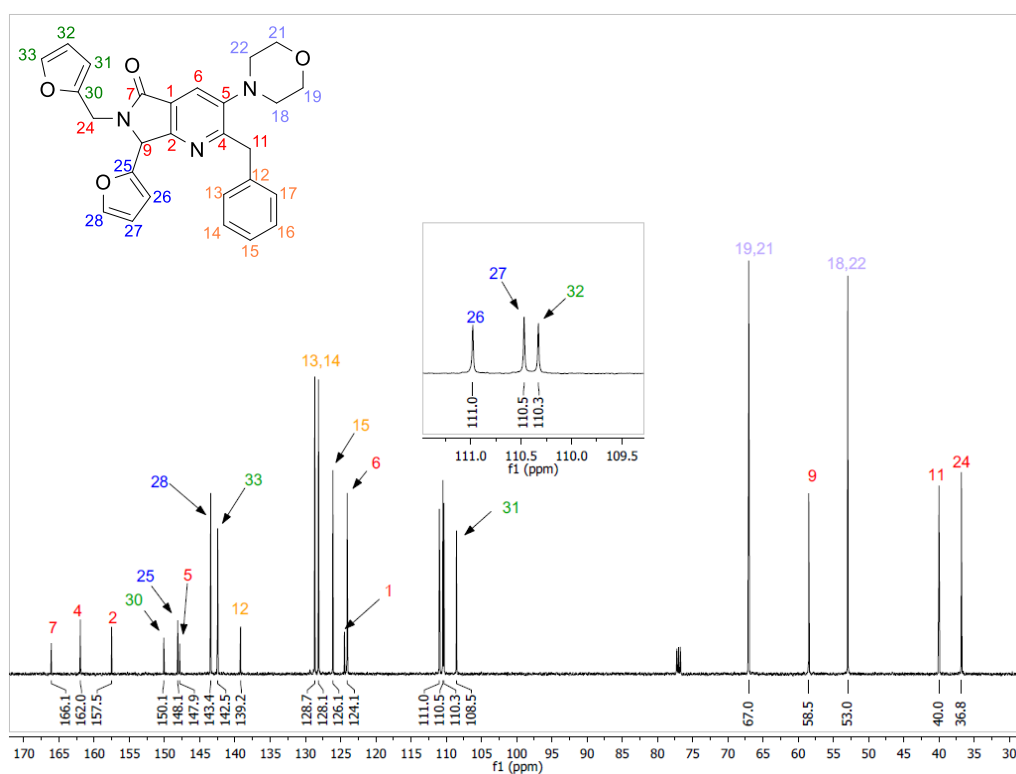

Figure S2. <sup>13</sup>C NMR spectrum of the compound 1a

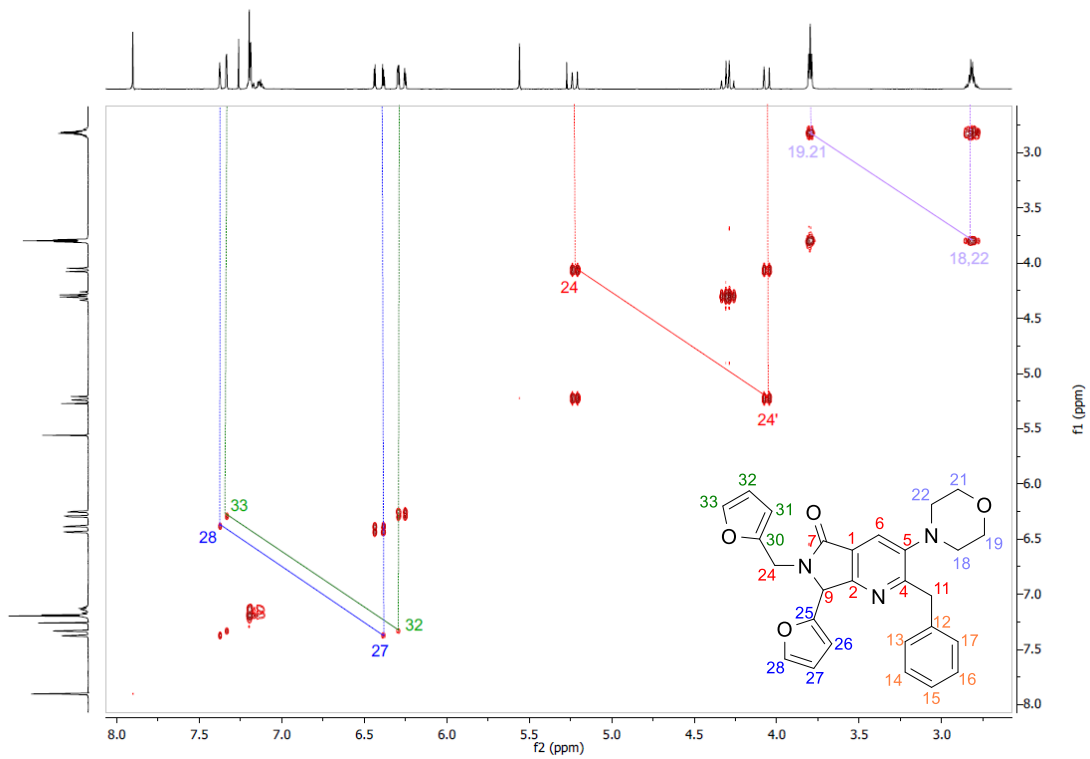

Figure S3. COSY spectrum of the compound 1a

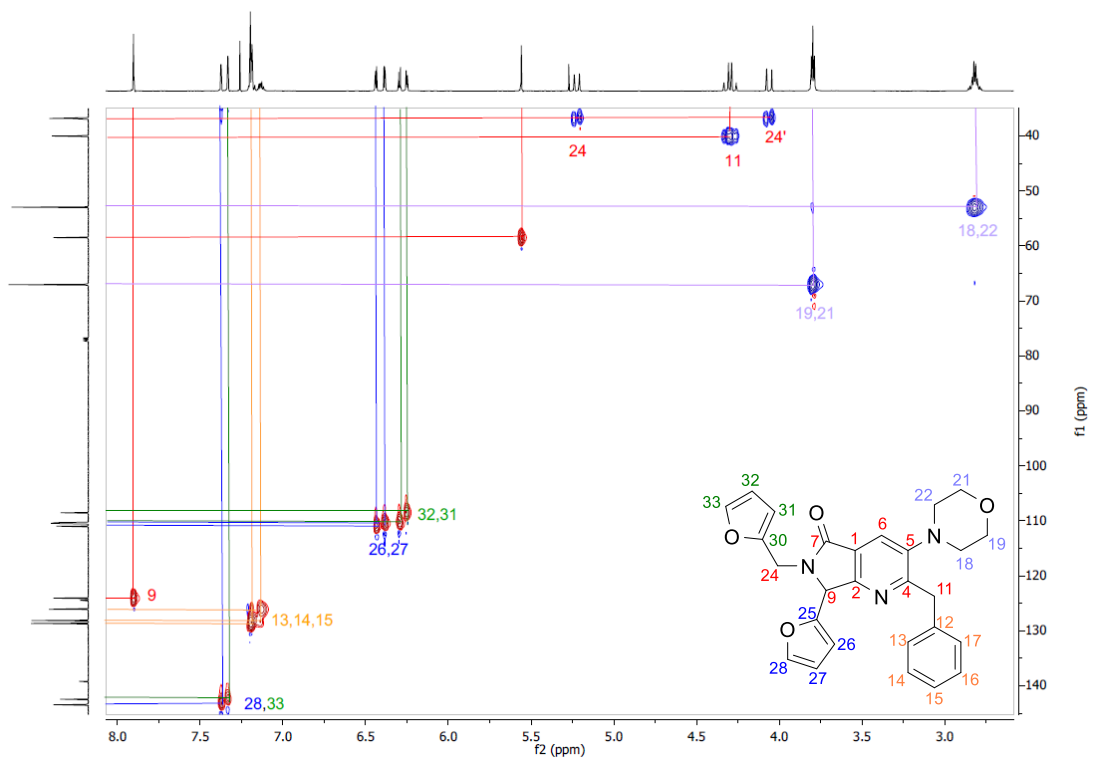

Figure S4. HSQC ( $^1\text{H}$ ,  $^{13}\text{C}$ ) spectrum of the compound 1a

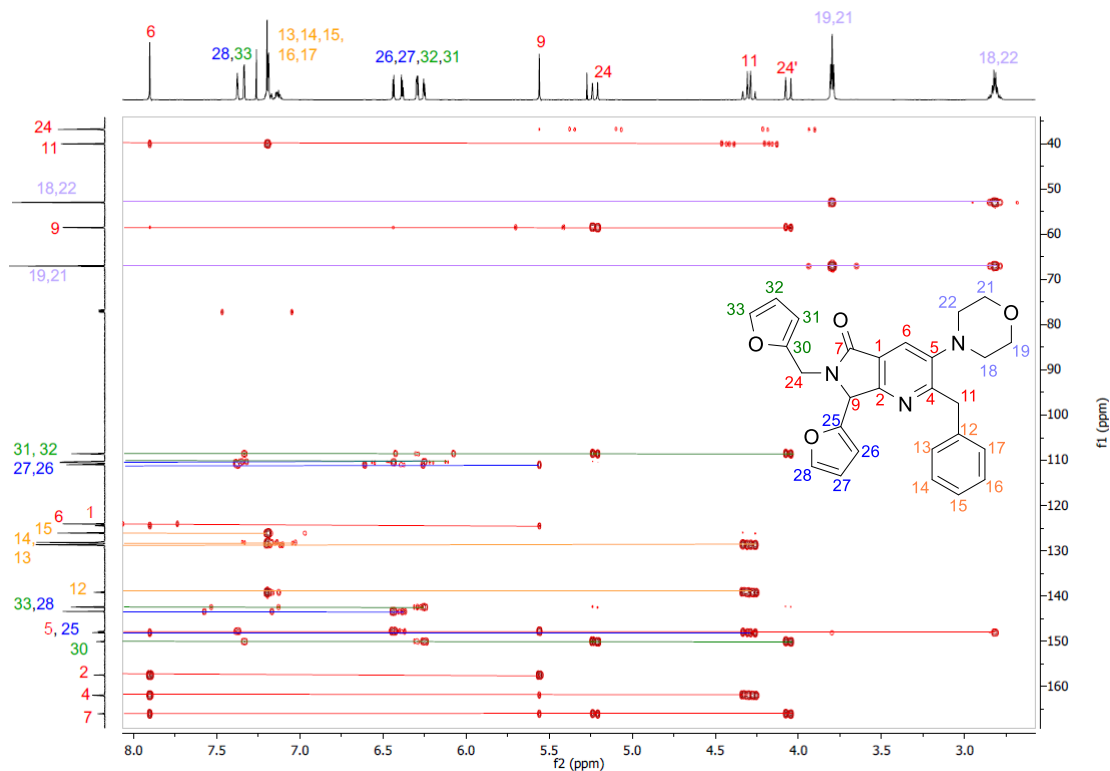

Figure S5. HMBC ( $^1\text{H}$ ,  $^{13}\text{C}$ ) spectrum of the compound **1a**

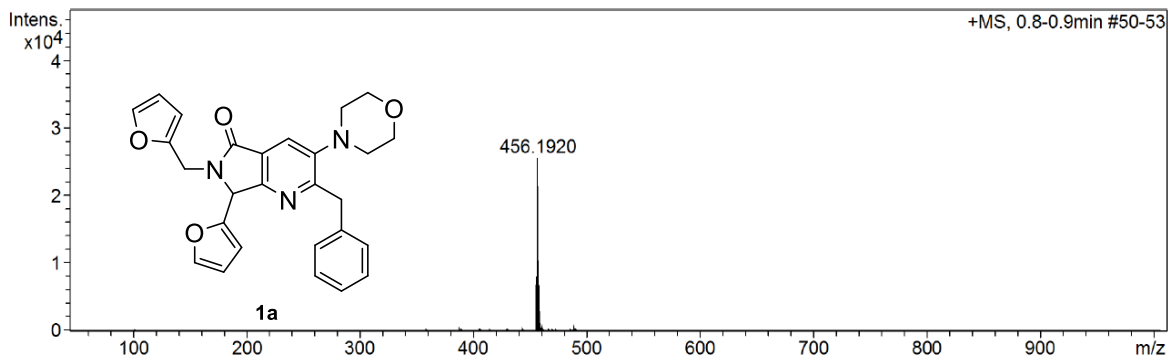

**Acquisition Parameter**

|             |          |                      |          |                  |            |
|-------------|----------|----------------------|----------|------------------|------------|
| Source Type | ESI      | Ion Polarity         | Positive | Set Nebulizer    | 3.0 Bar    |
| Focus       | Active   | Set Capillary        | 4500 V   | Set Dry Heater   | 210 °C     |
| Scan Begin  | 50 m/z   | Set End Plate Offset | -500 V   | Set Dry Gas      | 10.0 l/min |
| Scan End    | 1000 m/z | Set Charging Voltage | 0 V      | Set Divert Valve | Source     |
|             |          | Set Corona           | 0 nA     | Set APCI Heater  | 0 °C       |

| Meas. m/z | # | Ion Formula                                                   | Sum Formula                                                   | m/z      | err [ppm] | mSigma | # Sigma |
|-----------|---|---------------------------------------------------------------|---------------------------------------------------------------|----------|-----------|--------|---------|
| 456.1920  | 1 | C <sub>27</sub> H <sub>26</sub> N <sub>3</sub> O <sub>4</sub> | C <sub>27</sub> H <sub>26</sub> N <sub>3</sub> O <sub>4</sub> | 456.1918 | 0.5       | 6.4    | 2       |

Figure S6. HRMS spectrum of the compound **1a**

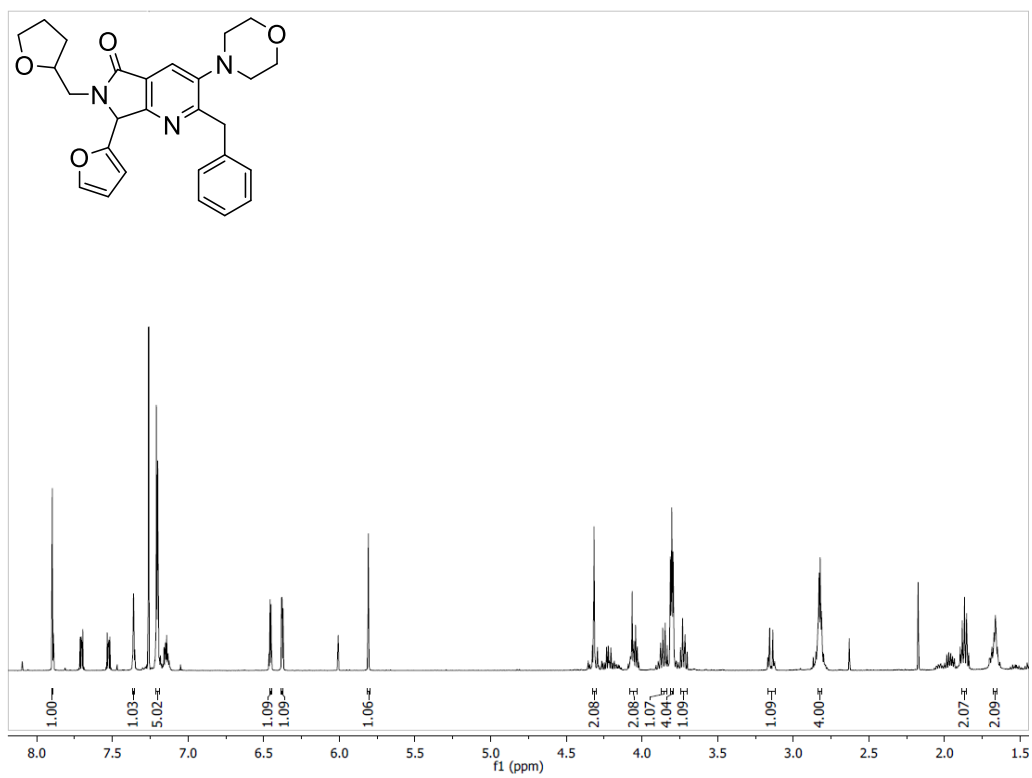

Figure S7. <sup>1</sup>H NMR spectrum of the compound **1b**

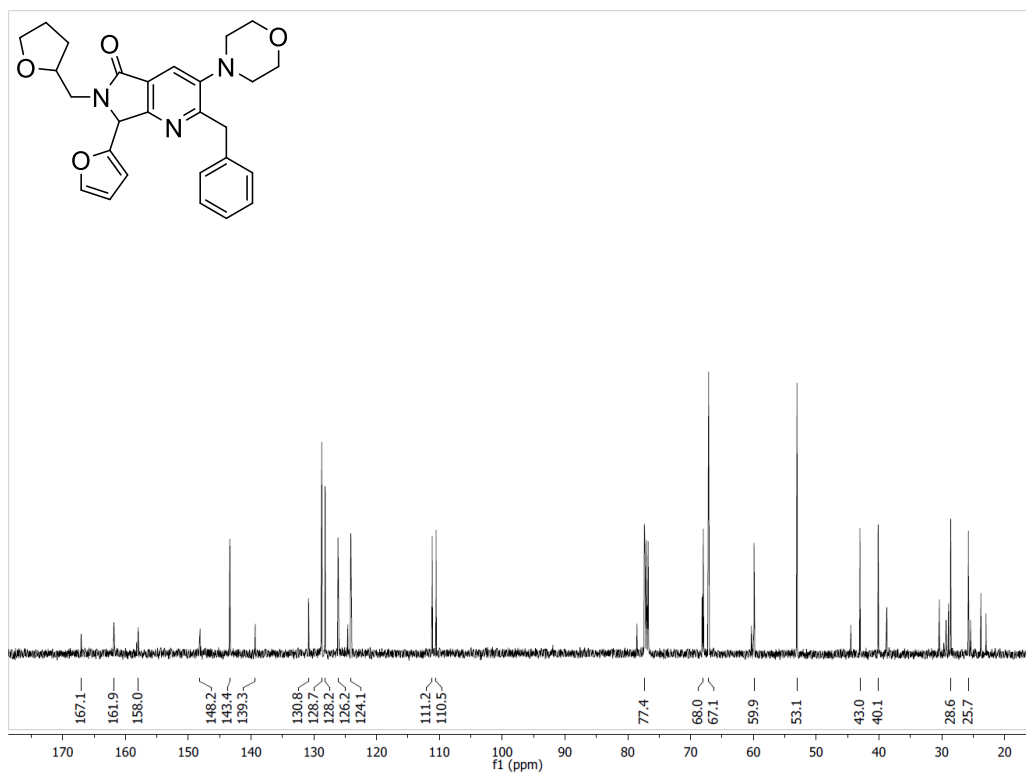

Figure S8. <sup>13</sup>C NMR spectrum of the compound **1b**

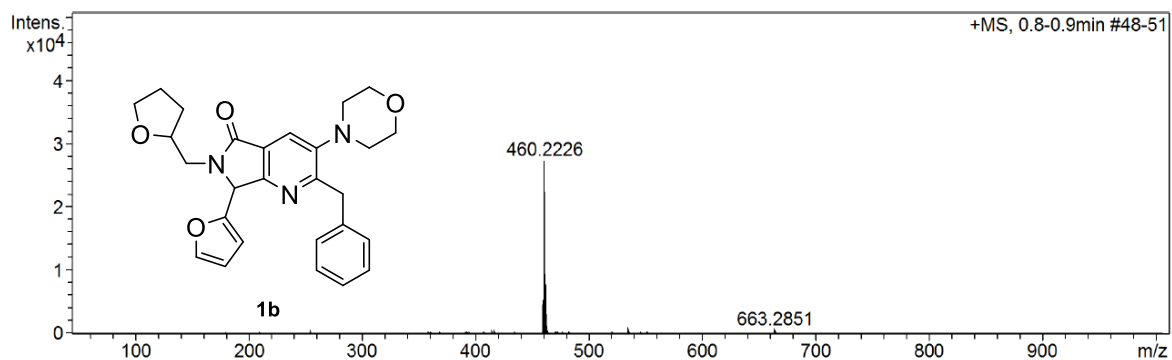

#### Acquisition Parameter

|             |          |                      |          |                  |            |
|-------------|----------|----------------------|----------|------------------|------------|
| Source Type | ESI      | Ion Polarity         | Positive | Set Nebulizer    | 3.0 Bar    |
| Focus       | Active   | Set Capillary        | 4500 V   | Set Dry Heater   | 210 °C     |
| Scan Begin  | 50 m/z   | Set End Plate Offset | -500 V   | Set Dry Gas      | 10.0 l/min |
| Scan End    | 1000 m/z | Set Charging Voltage | 0 V      | Set Divert Valve | Source     |
|             |          | Set Corona           | 0 nA     | Set APCI Heater  | 0 °C       |

| Meas. m/z | # | Ion Formula                                                   | Sum Formula                                                   | m/z      | err [ppm] | mSigma | # Sigma |
|-----------|---|---------------------------------------------------------------|---------------------------------------------------------------|----------|-----------|--------|---------|
| 460.2226  | 1 | C <sub>27</sub> H <sub>30</sub> N <sub>3</sub> O <sub>4</sub> | C <sub>27</sub> H <sub>29</sub> N <sub>3</sub> O <sub>4</sub> | 460.2231 | 1.1       | 21.2   | 1       |

**Figure S9.** HRMS spectrum of the compound **1b**

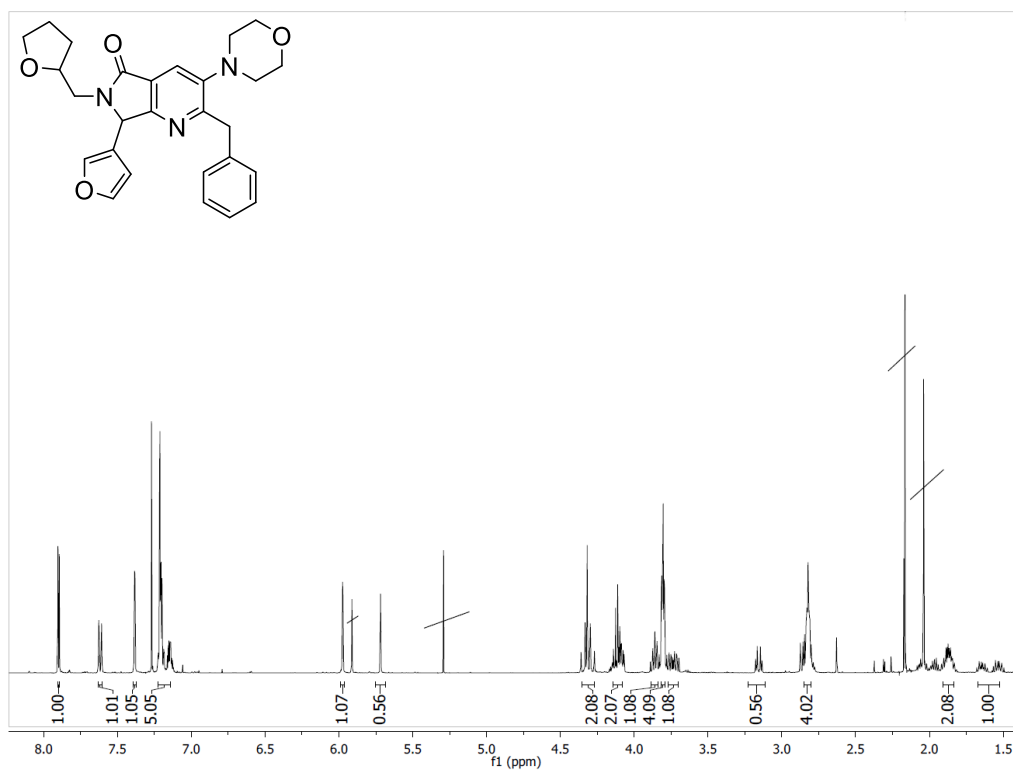

**Figure S10.** <sup>1</sup>H NMR spectrum of the compound **1c**

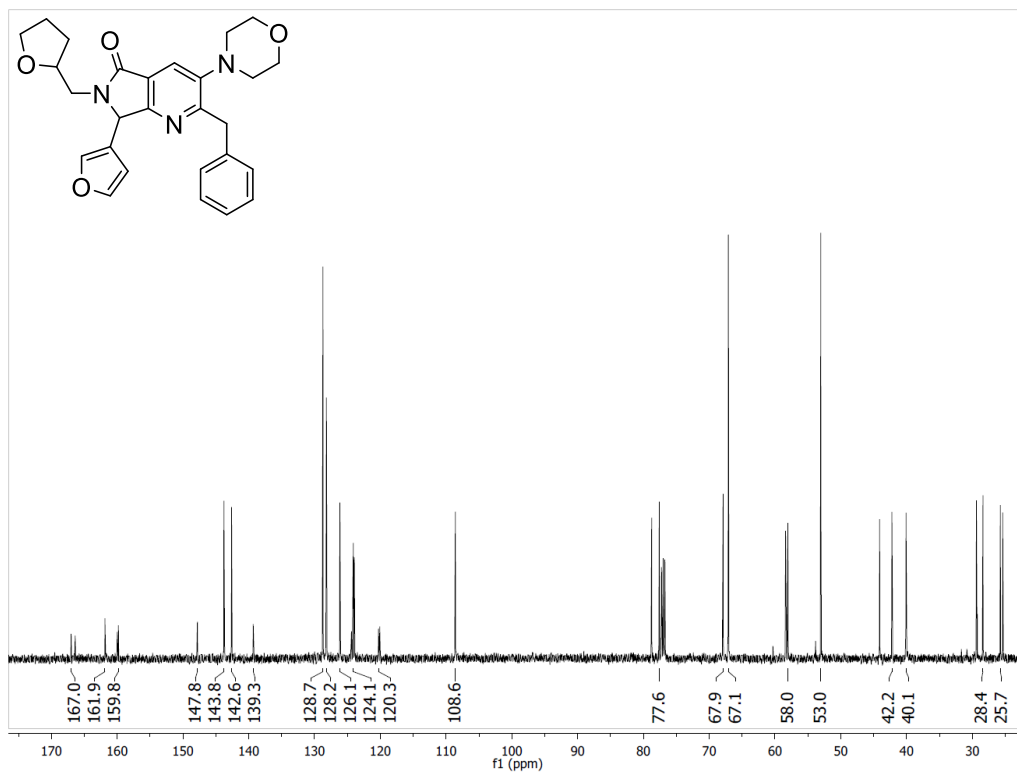

Figure S11. <sup>13</sup>C NMR spectrum of the compound 1c

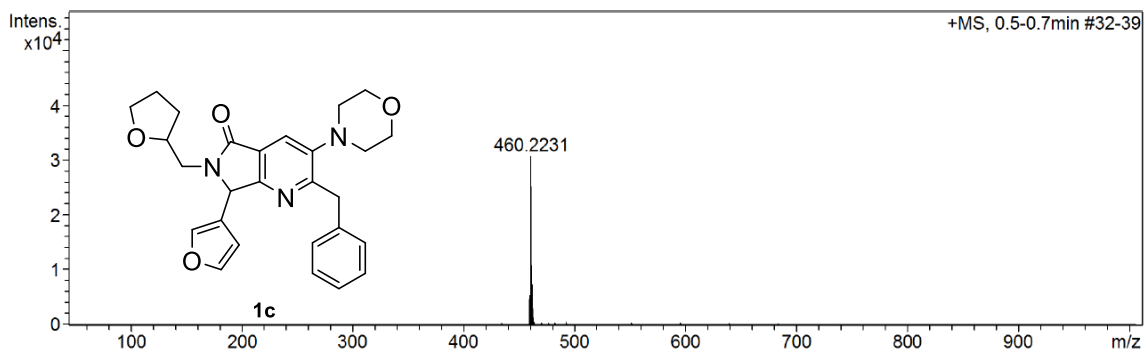

Acquisition Parameter

|             |          |                      |          |                  |            |
|-------------|----------|----------------------|----------|------------------|------------|
| Source Type | ESI      | Ion Polarity         | Positive | Set Nebulizer    | 3.0 Bar    |
| Focus       | Active   | Set Capillary        | 4500 V   | Set Dry Heater   | 210 °C     |
| Scan Begin  | 50 m/z   | Set End Plate Offset | -500 V   | Set Dry Gas      | 10.0 l/min |
| Scan End    | 1000 m/z | Set Charging Voltage | 0 V      | Set Divert Valve | Source     |
|             |          | Set Corona           | 0 nA     | Set APCI Heater  | 0 °C       |

| Meas. m/z | # | Ion Formula                                                   | Sum Formula                                                   | m/z      | err [ppm] | mSigma | # Sigma |
|-----------|---|---------------------------------------------------------------|---------------------------------------------------------------|----------|-----------|--------|---------|
| 460.2231  | 1 | C <sub>27</sub> H <sub>30</sub> N <sub>3</sub> O <sub>4</sub> | C <sub>27</sub> H <sub>29</sub> N <sub>3</sub> O <sub>4</sub> | 460.2231 | 0.1       | 5.8    | 1       |

Figure S12. HRMS spectrum of the compound 1c

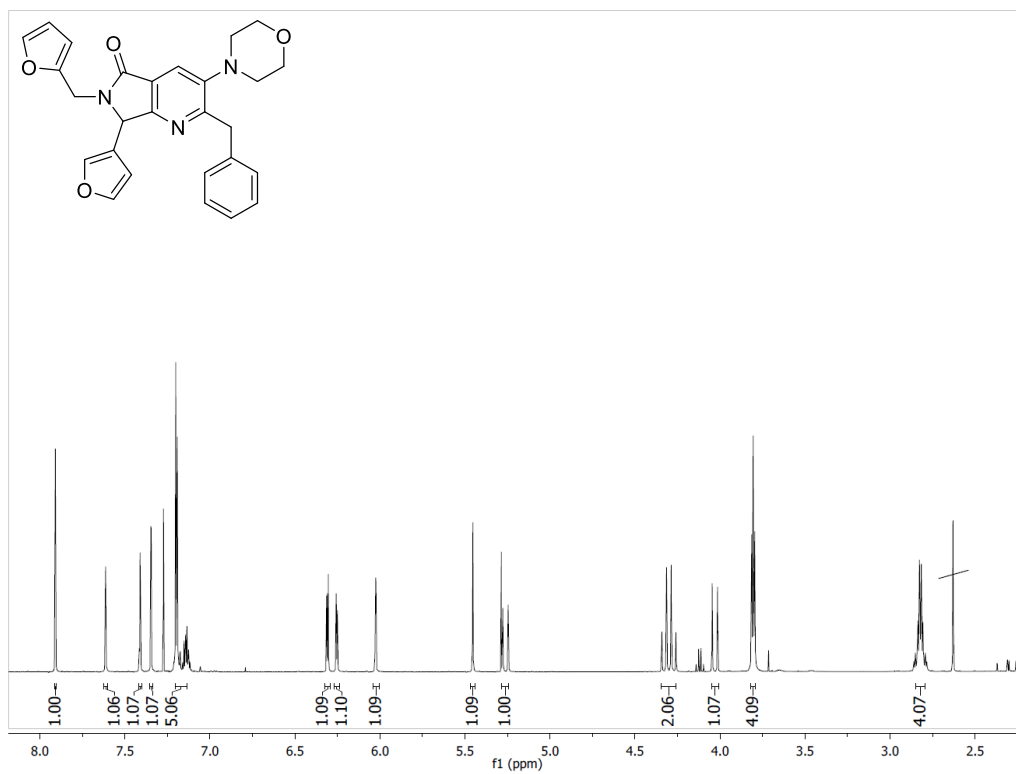

Figure S13. <sup>1</sup>H NMR spectrum of the compound 1d

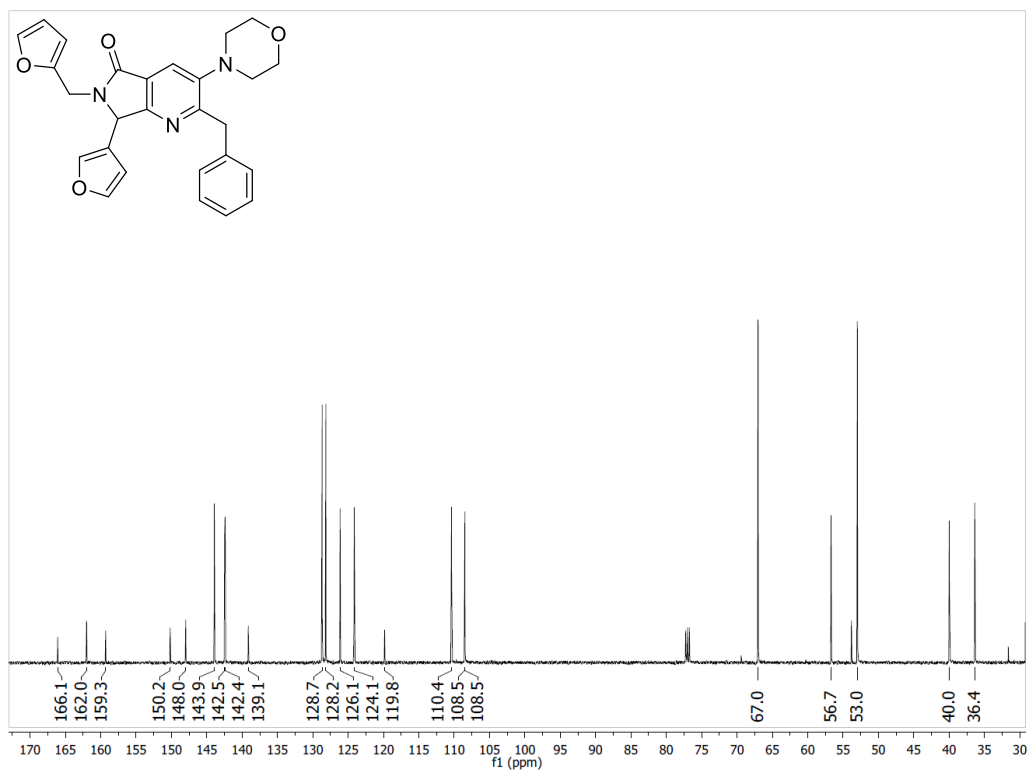

Figure S14. <sup>13</sup>C NMR spectrum of the compound 1d



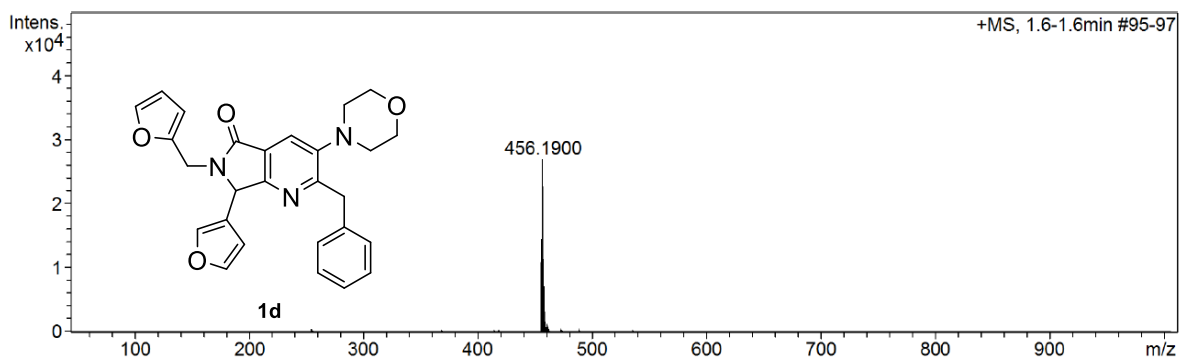

#### Acquisition Parameter

|             |          |                      |          |                  |            |
|-------------|----------|----------------------|----------|------------------|------------|
| Source Type | ESI      | Ion Polarity         | Positive | Set Nebulizer    | 3.0 Bar    |
| Focus       | Active   | Set Capillary        | 4500 V   | Set Dry Heater   | 210 °C     |
| Scan Begin  | 50 m/z   | Set End Plate Offset | -500 V   | Set Dry Gas      | 10.0 l/min |
| Scan End    | 1000 m/z | Set Charging Voltage | 0 V      | Set Divert Valve | Source     |
|             |          | Set Corona           | 0 nA     | Set APCI Heater  | 0 °C       |

| Meas. m/z | # | Ion Formula                                                   | Sum Formula                                                   | m/z      | err [ppm] | mSigma | # Sigma |
|-----------|---|---------------------------------------------------------------|---------------------------------------------------------------|----------|-----------|--------|---------|
| 456.1900  | 1 | C <sub>28</sub> H <sub>22</sub> N <sub>7</sub>                | C <sub>28</sub> H <sub>21</sub> N <sub>7</sub>                | 456.1931 | 6.9       | 11.0   | 1       |
|           | 2 | C <sub>27</sub> H <sub>26</sub> N <sub>3</sub> O <sub>4</sub> | C <sub>27</sub> H <sub>25</sub> N <sub>3</sub> O <sub>4</sub> | 456.1918 | -4.0      | 11.5   | 2       |

Figure S15. HRMS spectrum of the compound **1d**

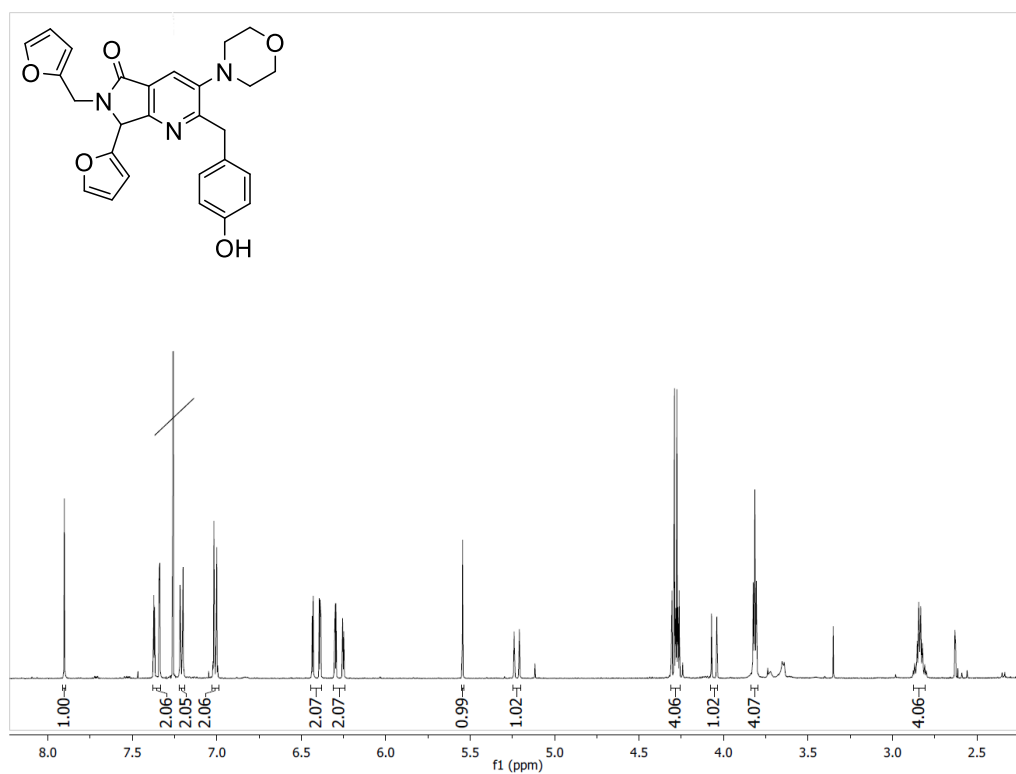

Figure S16. <sup>1</sup>H NMR spectrum of the compound **1e**

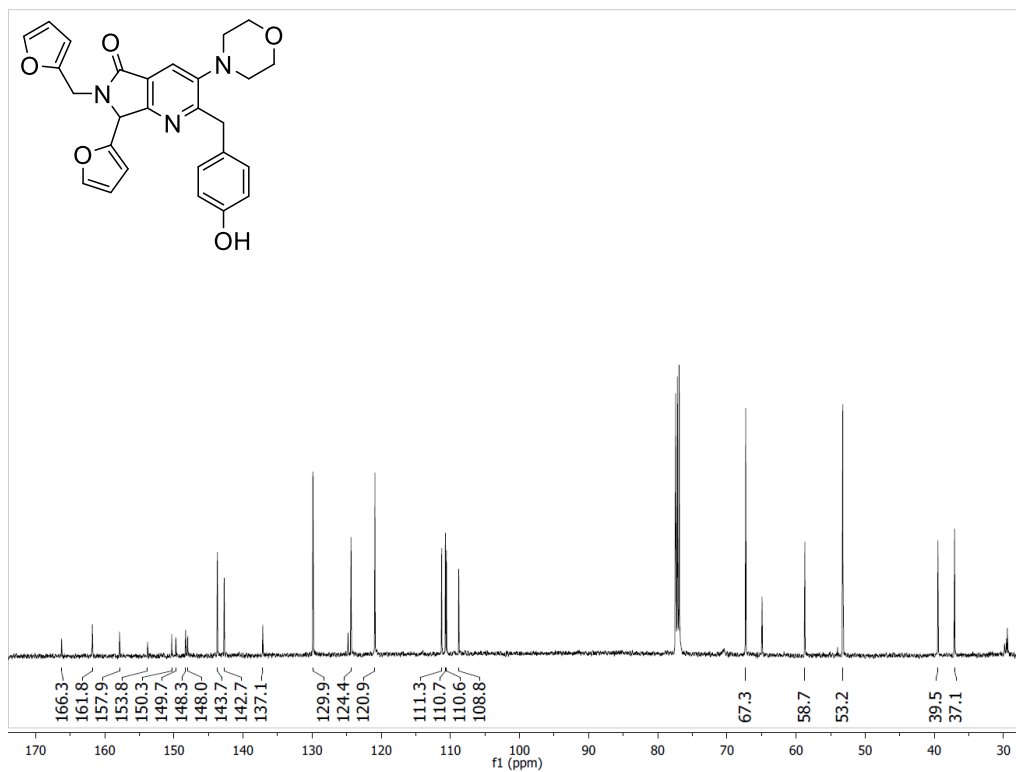

**Figure S17.**  $^{13}\text{C}$  NMR spectrum of the compound **1e**

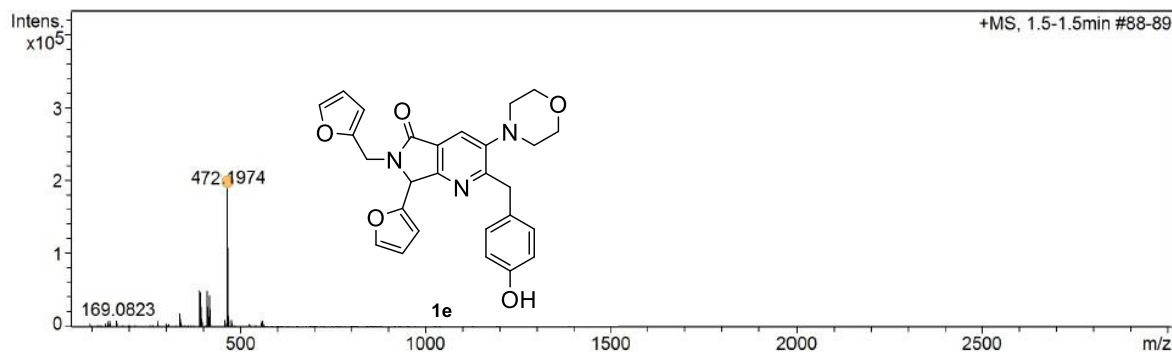

**Acquisition Parameter**

|             |          |                      |          |                  |           |
|-------------|----------|----------------------|----------|------------------|-----------|
| Source Type | ESI      | Ion Polarity         | Positive | Set Nebulizer    | 0.3 Bar   |
| Focus       | Active   |                      |          | Set Dry Heater   | 180 °C    |
| Scan Begin  | 50 m/z   | Set Capillary        | 4500 V   | Set Dry Gas      | 4.0 l/min |
| Scan End    | 3000 m/z | Set End Plate Offset | -500 V   | Set Divert Valve | Waste     |

| Meas. m/z | # | Ion Formula                                                   | Sum Formula                                                   | m/z      | err [ppm] | mSigma | # Sigma |
|-----------|---|---------------------------------------------------------------|---------------------------------------------------------------|----------|-----------|--------|---------|
| 472.1974  | 1 | C <sub>27</sub> H <sub>26</sub> N <sub>3</sub> O <sub>5</sub> | C <sub>27</sub> H <sub>25</sub> N <sub>3</sub> O <sub>5</sub> | 472.1978 | 0.8       | 191.4  | 1       |

**Figure S18.** HRMS spectrum of the compound **1e**

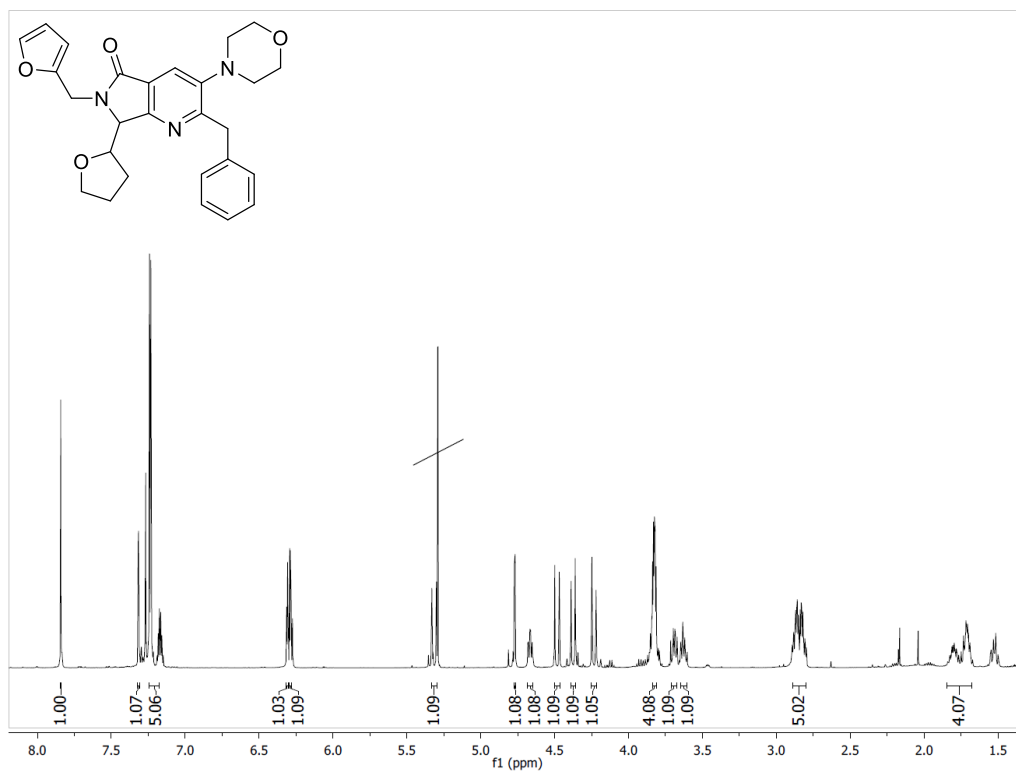

Figure S19. <sup>1</sup>H NMR spectrum of the compound **1f**

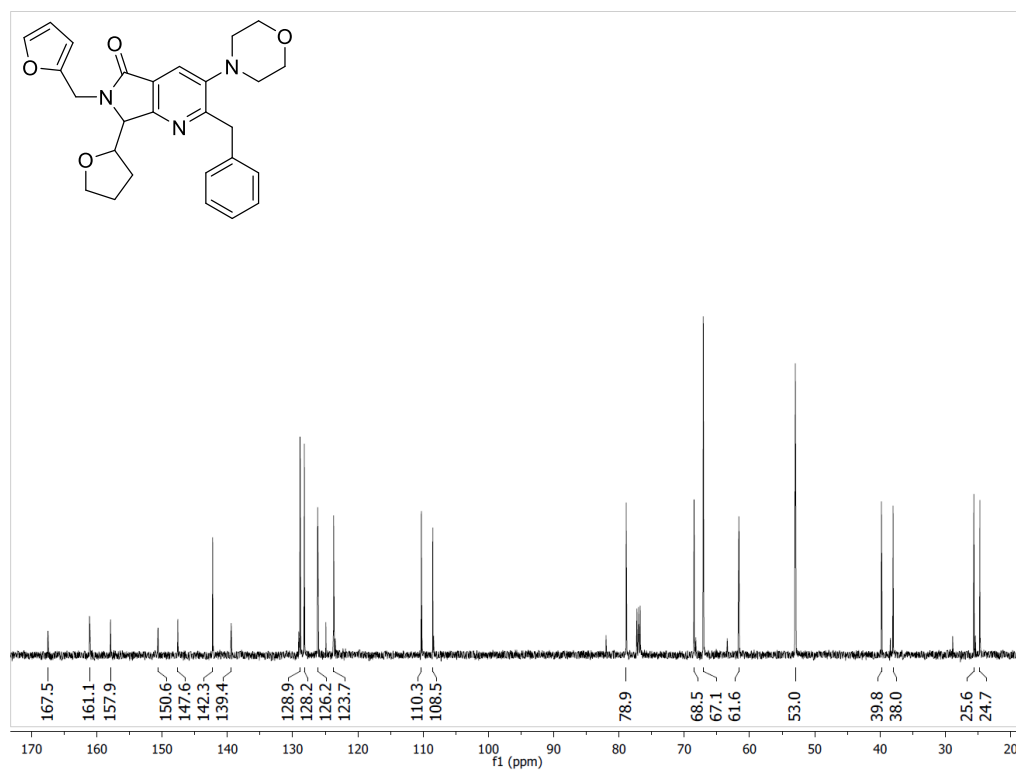

Figure S20. <sup>13</sup>C NMR spectrum of the compound **1f**

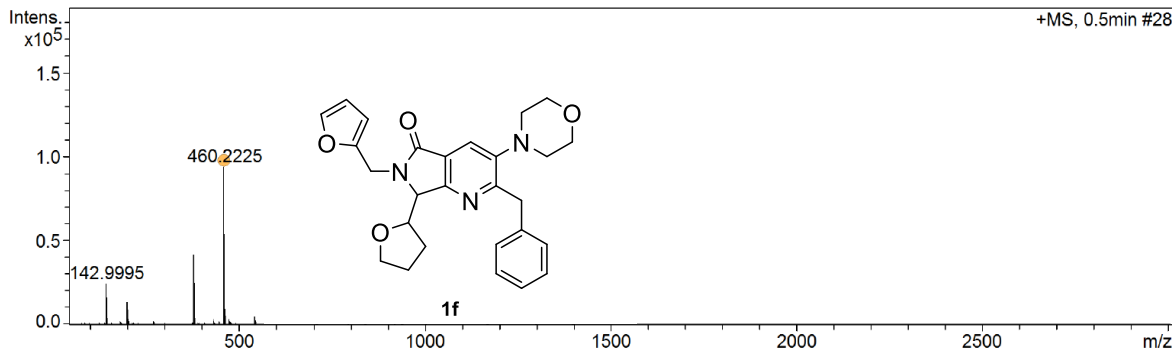

#### Acquisition Parameter

|             |          |                      |          |                  |           |
|-------------|----------|----------------------|----------|------------------|-----------|
| Source Type | ESI      | Ion Polarity         | Positive | Set Nebulizer    | 0.3 Bar   |
| Focus       | Active   |                      |          | Set Dry Heater   | 180 °C    |
| Scan Begin  | 50 m/z   | Set Capillary        | 4500 V   | Set Dry Gas      | 4.0 l/min |
| Scan End    | 3000 m/z | Set End Plate Offset | -500 V   | Set Divert Valve | Waste     |

| Meas. m/z | # | Ion Formula | Sum Formula   | m/z      | err [ppm] | mSigma | # Sigma |
|-----------|---|-------------|---------------|----------|-----------|--------|---------|
| 460.2225  | 1 | C27H30N3O4  | C27 H29 N3 O4 | 460.2231 | -1.3      | 86.4   | 1       |

**Figure S21.** HRMS spectrum of the compound **1f**

## 2. Docking

Cartesian coordinates of bioactive conformations

### 1e in SARS-CoV-2-M<sup>Pro</sup>

|   |           |          |          |
|---|-----------|----------|----------|
| C | -11.50970 | 11.74480 | 70.23320 |
| C | -11.66100 | 10.48970 | 70.80910 |
| C | -12.62350 | 10.24370 | 71.73020 |
| N | -13.48440 | 11.21310 | 72.12880 |
| C | -13.40530 | 12.46900 | 71.59410 |
| C | -12.40680 | 12.76760 | 70.62390 |
| C | -10.92280 | 9.26630  | 70.63980 |
| C | -12.59660 | 8.81830  | 72.18240 |
| H | -10.58390 | 16.95490 | 70.66620 |
| C | -14.38720 | 13.51240 | 72.05680 |
| N | -12.33220 | 14.09750 | 70.06310 |
| H | -10.72740 | 11.91810 | 69.50640 |
| O | -9.92440  | 9.16530  | 69.94260 |
| N | -11.42800 | 8.19380  | 71.47010 |
| C | -13.94860 | 8.18880  | 71.90470 |
| H | -12.38910 | 8.80130  | 73.27480 |
| C | -11.73620 | 6.99350  | 70.66320 |
| H | -11.40260 | 7.12310  | 69.60790 |
| H | -12.83110 | 6.80490  | 70.66520 |
| C | -11.10480 | 5.77560  | 71.27700 |
| C | -14.28160 | 6.96410  | 72.29340 |
| O | -14.96670 | 8.86560  | 71.25270 |
| H | -13.65770 | 6.25550  | 72.82850 |
| C | -15.64040 | 6.78520  | 71.86010 |
| H | -16.27000 | 5.91130  | 71.98880 |

|   |           |          |          |
|---|-----------|----------|----------|
| C | -15.97570 | 7.92010  | 71.26630 |
| H | -10.57940 | 3.62420  | 73.57280 |
| C | -10.21510 | 5.01110  | 70.65600 |
| O | -11.41230 | 5.35370  | 72.55860 |
| C | -9.88280  | 3.97770  | 71.59840 |
| H | -11.72170 | 15.47620 | 67.00870 |
| H | -12.99490 | 15.98610 | 68.15870 |
| C | -10.60860 | 4.23390  | 72.67610 |
| H | -15.17140 | 13.02040 | 72.67240 |
| H | -14.89900 | 13.96560 | 71.18020 |
| H | -14.67070 | 16.22470 | 71.76220 |
| C | -13.69580 | 14.60950 | 72.82460 |
| C | -12.77340 | 14.29260 | 73.83500 |
| C | -12.14500 | 15.30780 | 74.56130 |
| C | -12.42050 | 16.65210 | 74.28690 |
| C | -13.33550 | 16.97240 | 73.26530 |
| C | -13.96390 | 15.95750 | 72.53800 |
| H | -12.54840 | 13.25830 | 74.06510 |
| H | -11.44150 | 15.04840 | 75.34240 |
| O | -11.78350 | 17.62410 | 75.02900 |
| H | -13.56520 | 18.00490 | 73.03430 |
| C | -12.04300 | 14.06910 | 68.61960 |
| C | -11.36250 | 14.94010 | 70.77960 |
| C | -11.34940 | 16.33780 | 70.15050 |
| H | -10.33760 | 14.50950 | 70.72630 |
| H | -11.65810 | 15.02830 | 71.84820 |
| C | -11.99340 | 15.50550 | 68.08480 |
| H | -12.84410 | 13.51260 | 68.08520 |
| H | -11.06770 | 13.57550 | 68.41300 |
| H | -12.33340 | 16.83940 | 70.29610 |
| O | -11.01820 | 16.26430 | 68.77580 |
| H | -9.82290  | 5.14560  | 69.65300 |
| H | -9.18630  | 3.15650  | 71.46720 |
| H | -16.95280 | 8.09860  | 70.83030 |
| H | -12.45710 | 18.09160 | 75.58690 |

**1d in SARS-CoV-2 Nsp3**

|   |          |           |          |
|---|----------|-----------|----------|
| C | 33.09850 | -36.25790 | 9.38940  |
| C | 33.98870 | -36.46670 | 8.34380  |
| C | 34.34190 | -35.46580 | 7.50270  |
| N | 33.85030 | -34.21050 | 7.65070  |
| C | 32.97530 | -33.92770 | 8.66290  |
| C | 32.57380 | -34.95480 | 9.56440  |
| C | 34.67960 | -37.64700 | 7.89550  |
| C | 35.30040 | -35.94660 | 6.45930  |
| H | 28.29560 | -34.93400 | 11.16190 |
| C | 32.44070 | -32.52510 | 8.78310  |
| N | 31.64500 | -34.64750 | 10.62820 |

|   |          |           |          |
|---|----------|-----------|----------|
| H | 32.82430 | -37.07670 | 10.04100 |
| O | 34.53070 | -38.75410 | 8.39040  |
| N | 35.51290 | -37.39860 | 6.73840  |
| C | 35.40280 | -35.95820 | 3.83030  |
| H | 34.69660 | -35.75210 | 1.83880  |
| C | 36.92780 | -37.67750 | 7.04980  |
| H | 37.02930 | -38.18530 | 8.03780  |
| H | 37.49650 | -36.72300 | 7.10080  |
| C | 37.55340 | -38.49300 | 5.95350  |
| C | 34.49250 | -35.69910 | 2.90300  |
| H | 39.09360 | -37.12820 | 5.28920  |
| H | 32.71000 | -35.21340 | 5.50890  |
| O | 33.25060 | -35.35310 | 3.41000  |
| C | 33.47910 | -35.42370 | 4.77240  |
| H | 36.43530 | -36.24760 | 3.66490  |
| H | 37.90990 | -41.05210 | 4.08310  |
| C | 38.57530 | -38.07880 | 5.21520  |
| O | 37.10160 | -39.76020 | 5.62940  |
| C | 38.84790 | -39.16050 | 4.30850  |
| H | 31.29230 | -35.43340 | 13.92400 |
| H | 31.06000 | -33.81430 | 13.19710 |
| C | 37.96140 | -40.10000 | 4.60060  |
| H | 31.35190 | -32.57380 | 9.00300  |
| H | 32.55260 | -31.99290 | 7.81340  |
| H | 34.03470 | -30.31360 | 8.46030  |
| C | 33.17750 | -31.74590 | 9.84210  |
| C | 33.09600 | -32.13250 | 11.19110 |
| C | 33.76750 | -31.40130 | 12.17560 |
| C | 34.52980 | -30.28510 | 11.82120 |
| C | 34.62580 | -29.90080 | 10.48130 |
| C | 33.95650 | -30.62930 | 9.49330  |
| H | 32.50710 | -32.99470 | 11.47880 |
| H | 33.69610 | -31.69960 | 13.21350 |
| H | 35.04750 | -29.71890 | 12.58470 |
| H | 35.21630 | -29.03610 | 10.20800 |
| C | 32.03510 | -35.28240 | 11.89810 |
| C | 30.26310 | -34.99680 | 10.26520 |
| C | 29.32990 | -34.62700 | 11.42390 |
| H | 30.16440 | -36.08520 | 10.05440 |
| H | 29.95660 | -34.42800 | 9.35990  |
| C | 31.02080 | -34.90650 | 12.98510 |
| H | 33.04230 | -34.92430 | 12.20520 |
| H | 32.06470 | -36.39060 | 11.80310 |
| H | 29.31980 | -33.52370 | 11.57850 |
| O | 29.71380 | -35.30000 | 12.60900 |
| C | 34.72140 | -35.77140 | 5.08200  |
| H | 39.61490 | -39.20960 | 3.54290  |
| H | 36.23690 | -35.34840 | 6.54510  |

### 3. Cell viability

Table. Cell viability at 100  $\mu$ M in Vero-E6 cells

| Compound  | Cell viability (%) |
|-----------|--------------------|
| <b>1a</b> | 73.64              |
| <b>1b</b> | 36.17              |
| <b>1c</b> | 76.21              |
| <b>1d</b> | 42.64              |
| <b>1e</b> | 65.46              |
| <b>1f</b> | 82.64              |
